# Supplementary material
Source: PubMed Central journal article supplement (PMC6854652)
Supplement: ct9b00310_si_001.pdf [file ct9b00310_si_001.pdf]

*Supplementary Information*

# **Less is more: Coarse-grained integrative modeling of large biomolecular assemblies with HADDOCK**

*Jorge Roel-Touris<sup>1</sup>, Charleen G. Don<sup>2</sup>, Rodrigo V. Honorato<sup>1</sup>, João P.G.L.M Rodrigues<sup>3</sup>,  
Alexandre M.J.J. Bonvin<sup>1\*</sup>*

<sup>1</sup>Bijvoet Center for Biomolecular Research, Faculty of Science – Chemistry, Utrecht University. The Netherlands.

<sup>2</sup>Department of Pharmaceutical Sciences, University of Basel. Switzerland.

<sup>3</sup>Department of Structural Biology, Stanford University School of Medicine, CA. USA.

\*To whom correspondence should be addressed. Email: [a.m.j.j.bonvin@uu.nl](mailto:a.m.j.j.bonvin@uu.nl)

## TABLE OF CONTENTS

|                                                                                      |   |
|--------------------------------------------------------------------------------------|---|
| <b>SI-1.</b> Implementation of the MARTINI force field for proteins in HADDOCK ..... | 3 |
|--------------------------------------------------------------------------------------|---|

**Table SI-1.** Backbone particle type.

**Table SI-2.** Backbone-backbone relations.

**Table SI-3.** Side chains amino acid dependent and corresponding parameters.

**Table SI-4.** Polar and charged amino acid and corresponding parameters.

|                                                                                               |   |
|-----------------------------------------------------------------------------------------------|---|
| <b>SI-2.</b> Detailed overview of the selected cases from the Protein Docking Benchmark ..... | 7 |
|-----------------------------------------------------------------------------------------------|---|

**Table SI-5.** Selected complexes for the CG protein-protein benchmark.

|                                                                                  |   |
|----------------------------------------------------------------------------------|---|
| <b>SI-3.</b> Coarse-grained integrative modeling of KaiC-KaiB with HADDOCK ..... | 8 |
|----------------------------------------------------------------------------------|---|

**Table SI-6.** List of residues used as “active” to drive the docking.

**Table SI-7.** Paired i-RMSD after cross-superimposition of the two 6 fold rings in KaiC.

**Table SI-8.** Cluster based statistics for the CI and CII docking runs based on the fraction of common contacts.

**Table SI-9.** Structural similarity assessment of the top 4 models of coarse-grained HADDOCK with respect to the cryo-EM model.

|                                                      |    |
|------------------------------------------------------|----|
| <b>SI-4.</b> Reduction of the energy landscape ..... | 10 |
|------------------------------------------------------|----|

**Table SI-10.** Number of acceptable or higher quality models generated at the rigid-body (it0) stage of coarse-grained and standard all-atom HADDOCK (*ab-initio* mode)

**Table SI-11.** Number of acceptable or higher quality models generated at the rigid-body (it0) stage of coarse-grained and standard all-atom HADDOCK (*information-driven* mode)

## SI-1. IMPLEMENTATION OF THE MARTINI FORCE FIELD FOR PROTEINS IN HADDOCK

Converted force field parameters from the original work of *de Jong. et al* into CNS compatible format.

**Table SI-1.** Backbone Particle Types.

| Amino Acid | Coil | Helix           | Extended | Turn |
|------------|------|-----------------|----------|------|
| ALA        | F4   | HPa/HP0/HP5/Hda | B0       | T0   |
| All others | F5   | H0/H5/Hd/Ha     | Bda      | Tda  |

**Table SI-2.** Backbone-Backbone Relations. D: Bond Length (Å).  $\phi$ : Bond Angle ( $^{\circ}$ ).  $\Psi$ : Bond Dihedral ( $^{\circ}$ ). K: Force Constant (kcal.mol $^{-1}$ ).

| Backbone SS | D <sub>BB</sub> | K <sub>BB</sub> | $\phi_{BBB}$  | K <sub>BBB</sub> | $\Psi_{BBBB}$ | K <sub>BBB</sub> |
|-------------|-----------------|-----------------|---------------|------------------|---------------|------------------|
| Coil        | 3.5             | 12.5            | 127           | 5.971            | -             | -                |
| Helix       | 3.1             | 12.5            | 96 $^{\circ}$ | 167.184          | -120          | 95.524           |
| Extended    | 3.5             | 12.5            | 134           | 5.971            | 0             | 0.57             |
| Turn        | 3.5             | 12.5            | 100           | 5.971            | -             | -                |

\*  $\phi_{BBB} = 98^{\circ}$  and  $K_{BBB} = 23.883$  Kcal.mol $^{-1}$  for PRO in Helix conformation.

**Table SI-3.** Side-chains amino acid dependent and corresponding parameters. BB denotes Backbone-Backbone while BS Backbone-Side-chain.

| Amino Acid | SC Bead Name    | $D_{BS}, D_{SS}, D_{SS}, D_{SS}$ | $K_{BS}, K_{SS}, K_{SS}, K_{SS}$ | $\phi_{BSS}, \phi_{BSS}, \phi_{SSS}, \phi_{SSS}$ | $K_{BSS}, K_{BSS}, K_{SSS}, K_{SSS}$ | $\Psi_{BSSS}, \Psi_{SSSS}$ | $K_{BSSS}, K_{SSSS}$ |
|------------|-----------------|----------------------------------|----------------------------------|--------------------------------------------------|--------------------------------------|----------------------------|----------------------|
| TRP        | WC4-SNd-SC5-SC5 | 3.00,2.70,2.70,2.70              | 50,500,500,500                   | 210,90,50,50                                     | 11.942, 5.971,11.942,11.942          | 0, 0, 0                    | 11.942,11.942,47.767 |
| TYR        | YC4-SC4-SP1     | 3.20,2.70, -                     | 50,500,500, -                    | 150,150, -                                       | 11.942,11.942, -                     | 0, -                       | 11.942, -            |
| PHE        | FC5-SC5-SC5     | 3.10,2.70, -                     | 75,500,500, -                    | 150,150, -                                       | 11.942,11.942, -                     | 0, -                       | 11.942, -            |
| HIS        | HC4-SP1-SP1     | 3.20,2.70, -                     | 75,500,500, -                    | 150,150, -                                       | 11.942,11.942, -                     | 0, -                       | 11.942, -            |
| CYS        | C5              | 3.10, -                          | 75, -                            | -                                                | -                                    | -                          | -                    |
| ILE        | AC1             | 3.10, -                          | 12.5, -                          | -                                                | -                                    | -                          | -                    |
| LEU        | LC1             | 3.30, -                          | 75, -                            | -                                                | -                                    | -                          | -                    |
| MET        | MC5             | 4.00, -                          | 25, -                            | -                                                | -                                    | -                          | -                    |
| PRO        | PC3             | 3.00, -                          | 75, -                            | -                                                | -                                    | -                          | -                    |
| VAL        | AC2             | 2.65, -                          | 12.5, -                          | -                                                | -                                    | -                          | -                    |
| ALA        | -               | -                                | -                                | -                                                | -                                    | -                          | -                    |
| GLY        | -               | -                                | -                                | -                                                | -                                    | -                          | -                    |

D: Bond Length (Å).  $\phi$ : Bond Angle (°).  $\Psi$ : Bond Dihedrals and Improper (°).

**Table SI-4.** Polar and charged amino acid and corresponding parameters beads including “fake-beads” for a better description of electrostatics. BB denotes Backbone-Backbone while BS Backbone-Side-chain. Q: Charge (electron charge units). D: Bond Length (Å).  $\phi$ : Bond Angle ( $^{\circ}$ ).

| Amino Acid | SC Bead Name | Q (SCd)    | $D_{BS}, D_{SS}, D_{SS}$ | $K_{BS}, K_{SS}, K_{SS}$ | $\phi_{BSS}$ | $K_{BSS}$ |
|------------|--------------|------------|--------------------------|--------------------------|--------------|-----------|
| ARG        | RN0-AQd-SCd  | +1.00      | 3.30,3.4,1.10            | 50,50,500                | 180          | 5.971     |
| LYS        | KC3-KQd-SCd  | +1.00      | 3.30,2.80,1.10           | 50,50,500                | 180          | 5.971     |
| ASN        | Nda-SCd-SCd  | $\pm 0.46$ | 3.20,1.10,2.80           | 50,500,500               | -            | -         |
| GLN        | QNda-SCd-SCd | $\pm 0.46$ | 4.00,1.10,2.80           | 50,500,500               | -            | -         |
| SER        | SN0-SCd-SCd  | $\pm 0.40$ | 2.50,1.10,2.80           | 75,500,500               | -            | -         |
| THR        | TNda-SCd-SCd | $\pm 0.31$ | 2.50,1.10,2.80           | 75,500,500               | -            | -         |
| GLU        | Qa-SCd       | -1.00      | 4.00,1.10                | 50,500                   | -            | -         |
| ASP        | DQa-SCd      | -1.00      | 3.20,1.10                | 75,500                   | -            | -         |

## SI-2. DETAILED OVERVIEW OF THE SELECTED CASES FROM THE PROTEIN DOCKING BENCHMARK 5, N = 27

**Table SI-5.** Selected complexes (27) for the CG protein-protein benchmark. Classified in the Protein-Protein Benchmark version 5.0 as: enzyme-inhibitor, enzyme-substrate, enzyme complex or others.

| Complex                                         | # Atoms | # Residues | MW     | Resolution | Receptor    | Resolution | Ligand       | Resolution |
|-------------------------------------------------|---------|------------|--------|------------|-------------|------------|--------------|------------|
| <b>1AZS</b> Adenylyl cyclase – GTPgammaS        | 5740    | 718        | 77020  | 2,3        | <b>1AB8</b> | 2,2        | <b>1AZT</b>  | 2,3        |
| <b>1DE4</b> HFE – Transferrin R                 | 13107   | 1641       | 172501 | 2,8        | <b>1A6Z</b> | 2,6        | <b>1CX8</b>  | 3,2        |
| <b>1EXB</b> T1 $\beta$ – K <sup>+</sup> channel | 13256   | 1668       | 177850 | 2,1        | <b>1QRQ</b> | 2,8        | <b>1QDV</b>  | 1,6        |
| <b>1GP2</b> Protein G trimer                    | 5781    | 737        | 77145  | 2,3        | <b>1GIA</b> | 2          | <b>1TBG</b>  | 2,5        |
| <b>1GXD</b> proMMP2 – TIMP2                     | 6466    | 816        | 85521  | 3,1        | <b>1CK7</b> | 2,8        | <b>1BR9</b>  | 2,1        |
| <b>1H1V</b> Actin – Gelsolin                    | 5414    | 695        | 71583  | 2,99       | <b>1IJJ</b> | 2,85       | <b>1D0N</b>  | 2,5        |
| <b>1HE8</b> Ras – PI3 $\gamma$ kinase           | 7396    | 915        | 98167  | 3          | <b>821P</b> | 1,5        | <b>1E8Z</b>  | 2,4        |
| <b>1IB1</b> 14-3-3 protein – N-acetylase        | 5046    | 632        | 70414  | 2,7        | <b>1QJB</b> | 2          | <b>1KUUY</b> | 2,4        |
| <b>1KXP</b> Actin – Vitamin D                   | 6167    | 787        | 82409  | 2,1        | <b>1IJJ</b> | 2,85       | <b>1KW2</b>  | 2,15       |
| <b>1N2C</b> Nitrogenase                         | 20058   | 2548       | 265698 | 3          | <b>3MIN</b> | 2,03       | <b>2NIP</b>  | 2,2        |
| <b>1RLB</b> Transthyretin – Retinol             | 5171    | 660        | 68709  | 3,1        | <b>2PAB</b> | 1,8        | <b>1HBP</b>  | 1,9        |
| <b>1T6B</b> Anthrax – Anthrax receptor          | 6695    | 846        | 88168  | 2,5        | <b>1ACC</b> | 2,1        | <b>1SHU</b>  | 1,5        |
| <b>1WDW</b> Tryptophan synthase                 | 7848    | 1011       | 103279 | 3          | <b>1V8Z</b> | 2,21       | <b>1GEQ</b>  | 2          |
| <b>1Y64</b> Actin – BNI1                        | 6119    | 767        | 81284  | 3          | <b>2FXU</b> | 1,35       | <b>1UX5</b>  | 2,5        |
| <b>2AJF</b> ACE2 – SARS                         | 6273    | 771        | 82831  | 2,9        | <b>1R42</b> | 2,2        | <b>2GHV</b>  | 2,2        |
| <b>2FJU</b> Phospholipase $\beta$ 2 – Rac       | 6993    | 873        | 92947  | 2,2        | <b>2ZKM</b> | 1,62       | <b>1MH1</b>  | 1,38       |
| <b>2GAF</b> VP55 – VP39                         | 5929    | 723        | 79736  | 2,4        | <b>3OWG</b> | 2,86       | <b>1VPT</b>  | 1,8        |
| <b>2OOR</b> NAD(P) $\alpha$ – NAD(P) $\beta$    | 6755    | 915        | 90178  | 2,32       | <b>1L7E</b> | 1,9        | <b>1E3T</b>  | NMR        |
| <b>3AAA</b> Actin – Myotrophin                  | 5033    | 634        | 66478  | 2,2        | <b>3AA7</b> | 1,9        | <b>1MYO</b>  | NMR        |
| <b>3BIW</b> Neuroglin                           | 5545    | 710        | 72968  | 3,5        | <b>3BIX</b> | 2,61       | <b>2R1D</b>  | 2,6        |
| <b>3L89</b> Ad21 – CD46                         | 5252    | 677        | 69446  | 3,5        | <b>3L88</b> | 2,5        | <b>1CKL</b>  | 3,1        |
| <b>3LVK</b> IscS – tusA                         | 6641    | 850        | 88578  | 2,442      | <b>3LVM</b> | 2,33       | <b>1DCJ</b>  | NMR        |
| <b>3R9A</b> Alanine-glyoxilate AT – PEX5P       | 8199    | 1063       | 108889 | 2,35       | <b>1H0C</b> | 2,5        | <b>2COM</b>  | 2,5        |
| <b>4GAM</b> Methane monooxygenase               | 18499   | 2262       | 243436 | 2,902      | <b>1XVB</b> | 1,8        | <b>1CKV</b>  | NMR        |
| <b>4H03</b> IA – Actin $\alpha$                 | 6152    | 770        | 82388  | 1,75       | <b>1GIQ</b> | 1,8        | <b>1IJJ</b>  | 2,85       |
| <b>4JCV</b> RecR – RecO                         | 7529    | 993        | 99383  | 3,34       | <b>1VDD</b> | 2,5        | <b>1W3S</b>  | 2,4        |
| <b>4LW4</b> CsdA – CsdE                         | 7095    | 935        | 93969  | 2,01       | <b>4LW2</b> | 1,8        | <b>1NI7</b>  | NMR        |

### SI-3. COARSE-GRAINED INTEGRATIVE MODELING of KaiC-KaiB WITH HADDOCK

**Table SI-6.** Detailed list of residues, identified by mutagenesis experiments in combination with hydrogen-deuterium exchange and mass spectroscopy (HDX-MS), used as “active” in HADDOCK-CG to drive the simulations (CI/CII).

| Protein | Domain | Residues                                                                                                                                                                                       |
|---------|--------|------------------------------------------------------------------------------------------------------------------------------------------------------------------------------------------------|
| KaiC    | C I    | Gly101, Leu103, Ile105, Leu106, Asp107, Ala108, Pro110, Asp111, Pro112, Glu113, Gly114, Gln115, Glu116, Val117, Val118, Gly119, Asp122, Leu123, Ser124, Ala125, Leu126, Ile130, Ala133, Ile134 |
|         | C II   | Met449, Ser450, Arg451, Ala452, Ile453, Asn454, Val455, Phe456, Lys457, Met458, Arg459, Gly460, His463, Asp464, Lys465, Ala466, Ile467, Arg468, Glu469, Phe470                                 |
| KaiB    |        | Thr7, Asn17, Thr18, Pro19, Glu33, Glu35, Gly38, Lys43, Leu48, Lys49, Pro51, Gln52, Glu55, Glu56, Lys58, Leu60, Pro70, Pro71, Pro72, Val73, Arg74, Ile77, Ser81, Asn82, Glu84, Lys85, Ile88     |

**Table SI-7.** Paired i-RMSD values (Å) calculated after cross-superimposition of the two 6 fold rings in KaiC.

| KaiC  | A - 1 | A - 2 | A - 3 | A - 4 | A - 5 | A - 6 |
|-------|-------|-------|-------|-------|-------|-------|
| A - 1 | -     | 0.96  | 1.29  | 1.9   | 0.8   | 0.89  |
| A - 2 | 0.96  | -     | 1.23  | 1.89  | 0.91  | 1.01  |
| A - 3 | 1.29  | 1.23  | -     | 1.28  | 0.89  | 1.25  |
| A - 4 | 1.9   | 1.89  | 1.28  | -     | 1.4   | 1.39  |
| A - 5 | 0.8   | 0.91  | 0.89  | 1.4   | -     | 0.92  |
| A - 6 | 0.89  | 1.01  | 1.25  | 1.39  | 0.92  | -     |

**Table SI-8.** Cluster based statistics for the CI and CII docking runs based on the fraction of common contacts (0.5 cutoff). HADDOCK score single terms averaged over the top 4 members of each cluster are reported and clusters are ordered according to the averaged HADDOCK score (a.u.).  $E_{vdw}$ : Lennard-Jones potential.  $E_{elec}$ : Coulomb potential.  $E_{AIR}$ : Ambiguous interaction restraints energy.  $E_{desolv}$ : Empirical desolvation score. BSA: Buried surface area.  $E_{symmetry}$ : Symmetry restraints energy.

| Cluster           | Population | $E_{vdw}$      | $E_{elec}$      | $E_{AIR}$        | $E_{desolv}$ | BSA              | $E_{symmetry}$ | HADDOCK score        | I-RMSD [Å] |
|-------------------|------------|----------------|-----------------|------------------|--------------|------------------|----------------|----------------------|------------|
| <b>CI domain</b>  |            |                |                 |                  |              |                  |                |                      |            |
| 1                 | 15         | -366.3 ± 28.4  | -809.3 ± 153    | 2899.2 ± 126.6   | 12.3 ± 12.3  | 11598.3 ± 799.5  | 91.5 ± 36.8    | <b>-216.7 ± 13.2</b> | 5.9 ± 1.3  |
| 3                 | 9          | -343.6 ± 18.1  | -917.3 ± 178.2  | 2946 ± 103.3     | 29 ± 19.1    | 10805.3 ± 611    | 114.2 ± 53.7   | <b>-191.9 ± 30.5</b> | 21.1 ± 6.6 |
| 9                 | 4          | -327.8 ± 18.7  | -1038.3 ± 145   | 3076.3 ± 350.6   | 27.6 ± 32.8  | 10905.4 ± 391.4  | 88.2 ± 19.6    | <b>-191.3 ± 43</b>   | 18.3 ± 6.5 |
| 2                 | 10         | -329.3 ± 16.8  | -1033.3 ± 122.7 | 3303.7 ± 231     | 36.3 ± 20    | 10669.7 ± 890.1  | 134.9 ± 63.5   | <b>-160.3 ± 16.9</b> | 19 ± 5.3   |
| 6                 | 4          | -304.9 ± 39.4  | -897.2 ± 116.6  | 3154.9 ± 250.8   | 6.9 ± 18.2   | 10432.8 ± 996.9  | 78.2 ± 5.5     | <b>-154.1 ± 52.6</b> | 16.8 ± 2.9 |
| <b>CII domain</b> |            |                |                 |                  |              |                  |                |                      |            |
| 2                 | 4          | 2206.6 ± 214.5 | -265 ± 27.4     | 21375.2 ± 5169.3 | -28.3 ± 77.8 | 14969.5 ± 5869.1 | 156.3 ± 45.48  | <b>+44.5 ± 19</b>    | -          |

**Table SI-9.** Structural similarity assessment of the top 4 models of coarse-grained HADDOCK (from the best cluster) with respect to the cryo-EM (backbone only) model (PDB ID: 5N8Y). B/C/D/E/F/G correspond to the 6 KaiB monomers, respectively, docked onto KaiC. i-RMSD, l-RMSD and FNAT are calculated according to CAPRI criteria.

| KaiB Subunits | i-RMSD [Å] | l-RMSD [Å] | FNAT        |
|---------------|------------|------------|-------------|
| Overall       | 10.1 ± 2.8 | 5.9 ± 1.3  | 0.09 ± 0.05 |
| B             | 8.4 ± 2.2  | 3.3 ± 0.4  | 0.07 ± 0.07 |
| C             | 8.3 ± 2.4  | 3.4 ± 0.4  | 0.05 ± 0.06 |
| D             | 8.8 ± 2.1  | 3.5 ± 0.4  | 0.05 ± 0.07 |
| E             | 8.3 ± 2.2  | 3.4 ± 0.4  | 0.11 ± 0.08 |
| F             | 8.4 ± 2.0  | 3.3 ± 0.4  | 0.05 ± 0.05 |
| G             | 6.7 ± 2.8  | 3.3 ± 0.4  | 0.12 ± 0.06 |



## SI-4. REDUCTION OF THE ENERGY LANDSCAPE COMPLEXITY

**Table SI-10.** Number of acceptable or higher quality models, for each of the protein docking benchmark complexes, generated at the rigid-body (it0) stage of coarse-grained and standard all-atom HADDOCK docking runs in the absence of information to drive the docking (*ab-initio* mode). 10000 models were generated in the case of *ab-initio* docking.

| Complex | Protocol       | Top 200 | Top 400 | Total |
|---------|----------------|---------|---------|-------|
| 1AZS    | Coarse-grained | 0       | 0       | 4     |
|         | All-atom       | 0       | 0       | 1     |
| 1DE4    | Coarse-grained | 0       | 0       | 4     |
|         | All-atom       | 0       | 0       | 0     |
| 1EXB    | Coarse-grained | 0       | 0       | 0     |
|         | All-atom       | 0       | 0       | 0     |
| 1GP2    | Coarse-grained | 0       | 1       | 4     |
|         | All-atom       | 2       | 3       | 3     |
| 1GXD    | Coarse-grained | 1       | 1       | 2     |
|         | All-atom       | 1       | 1       | 1     |
| 1H1V    | Coarse-grained | 0       | 0       | 0     |
|         | All-atom       | 0       | 0       | 0     |
| 1HE8    | Coarse-grained | 4       | 4       | 4     |
|         | All-atom       | 0       | 0       | 6     |
| 1IB1    | Coarse-grained | 0       | 0       | 0     |
|         | All-atom       | 0       | 0       | 0     |
| 1KXP    | Coarse-grained | 2       | 2       | 2     |
|         | All-atom       | 0       | 0       | 2     |
| 1N2C    | Coarse-grained | 0       | 0       | 0     |
|         | All-atom       | 0       | 0       | 0     |
| 1RLB    | Coarse-grained | 0       | 0       | 3     |
|         | All-atom       | 0       | 0       | 0     |
| 1T6B    | Coarse-grained | 2       | 2       | 17    |
|         | All-atom       | 0       | 0       | 19    |
| 1WDW    | Coarse-grained | 0       | 0       | 4     |
|         | All-atom       | 3       | 3       | 3     |
| 1Y64    | Coarse-grained | 0       | 0       | 0     |
|         | All-atom       | 0       | 0       | 0     |
| 2AJF    | Coarse-grained | 0       | 0       | 1     |
|         | All-atom       | 0       | 0       | 0     |
| 2FJU    | Coarse-grained | 0       | 0       | 4     |
|         | All-atom       | 0       | 0       | 1     |
| 2GAF    | Coarse-grained | 0       | 0       | 0     |
|         | All-atom       | 0       | 0       | 2     |
| 2OOR    | Coarse-grained | 0       | 0       | 0     |
|         | All-atom       | 0       | 0       | 0     |
| 3AAA    | Coarse-grained | 0       | 0       | 1     |
|         | All-atom       | 0       | 0       | 0     |
| 3BIW    | Coarse-grained | 0       | 0       | 5     |
|         | All-atom       | 0       | 0       | 5     |
| 3L89    | Coarse-grained | 1       | 1       | 1     |
|         | All-atom       | 0       | 0       | 2     |
| 3LVK    | Coarse-grained | 2       | 2       | 5     |
|         | All-atom       | 1       | 1       | 2     |
| 3R9A    | Coarse-grained | 0       | 0       | 0     |
|         | All-atom       | 0       | 0       | 0     |
| 4GAM    | Coarse-grained | 0       | 0       | 0     |
|         | All-atom       | 0       | 0       | 0     |
| 4H03    | Coarse-grained | 2       | 2       | 7     |
|         | All-atom       | 3       | 4       | 4     |
| 4JCV    | Coarse-grained | 1       | 1       | 2     |
|         | All-atom       | 0       | 0       | 1     |
| 4LW4    | Coarse-grained | 0       | 0       | 4     |
|         | All-atom       | 1       | 1       | 1     |
| TOTAL   | Coarse-grained | 15      | 16      | 74    |
|         | All-atom       | 11      | 13      | 53    |

**Table SI-11.** Number of acceptable or higher quality models, for each of the protein docking benchmark complexes, generated at the rigid-body (it0) stage of the coarse-grained and standard all-atom HADDOCK docking runs using true interface information to drive the docking. 1000 models were generated in the case of *information-driven* docking.

| Complex | Protocol       | Top 200 | Top 400 | Total |
|---------|----------------|---------|---------|-------|
| 1AZS    | Coarse-grained | 170     | 270     | 332   |
|         | All-atom       | 65      | 117     | 213   |
| 1DE4    | Coarse-grained | 2       | 6       | 120   |
|         | All-atom       | 137     | 264     | 353   |
| 1EXB    | Coarse-grained | 36      | 73      | 143   |
|         | All-atom       | 33      | 69      | 185   |
| 1GP2    | Coarse-grained | 111     | 148     | 155   |
|         | All-atom       | 152     | 206     | 215   |
| 1GXD    | Coarse-grained | 102     | 148     | 184   |
|         | All-atom       | 66      | 118     | 146   |
| 1H1V    | Coarse-grained | 0       | 0       | 0     |
|         | All-atom       | 8       | 26      | 48    |
| 1HE8    | Coarse-grained | 157     | 285     | 491   |
|         | All-atom       | 53      | 63      | 212   |
| 1IB1    | Coarse-grained | 0       | 0       | 0     |
|         | All-atom       | 1       | 1       | 9     |
| 1KXP    | Coarse-grained | 199     | 395     | 563   |
|         | All-atom       | 188     | 337     | 511   |
| 1N2C    | Coarse-grained | 0       | 1       | 4     |
|         | All-atom       | 34      | 70      | 183   |
| 1RLB    | Coarse-grained | 160     | 320     | 618   |
|         | All-atom       | 190     | 357     | 734   |
| 1T6B    | Coarse-grained | 184     | 367     | 803   |
|         | All-atom       | 143     | 324     | 667   |
| 1WDW    | Coarse-grained | 200     | 397     | 680   |
|         | All-atom       | 200     | 399     | 620   |
| 1Y64    | Coarse-grained | 0       | 0       | 0     |
|         | All-atom       | 0       | 0       | 0     |
| 2AJF    | Coarse-grained | 66      | 156     | 412   |
|         | All-atom       | 111     | 257     | 422   |
| 2FJU    | Coarse-grained | 126     | 253     | 694   |
|         | All-atom       | 165     | 347     | 703   |
| 2GAF    | Coarse-grained | 131     | 250     | 573   |
|         | All-atom       | 157     | 266     | 570   |
| 2OOR    | Coarse-grained | 17      | 18      | 25    |
|         | All-atom       | 38      | 43      | 46    |
| 3AAA    | Coarse-grained | 52      | 132     | 289   |
|         | All-atom       | 128     | 230     | 369   |
| 3BIW    | Coarse-grained | 107     | 245     | 627   |
|         | All-atom       | 3       | 21      | 218   |
| 3L89    | Coarse-grained | 109     | 230     | 488   |
|         | All-atom       | 132     | 253     | 430   |
| 3LVK    | Coarse-grained | 199     | 386     | 708   |
|         | All-atom       | 188     | 301     | 411   |
| 3R9A    | Coarse-grained | 152     | 327     | 790   |
|         | All-atom       | 113     | 260     | 725   |
| 4GAM    | Coarse-grained | 0       | 0       | 0     |
|         | All-atom       | 0       | 0       | 0     |
| 4H03    | Coarse-grained | 186     | 376     | 606   |
|         | All-atom       | 90      | 215     | 454   |
| 4JCV    | Coarse-grained | 173     | 250     | 289   |
|         | All-atom       | 198     | 252     | 266   |
| 4LW4    | Coarse-grained | 27      | 33      | 95    |
|         | All-atom       | 109     | 144     | 186   |
| TOTAL   | Coarse-grained | 2666    | 5066    | 9689  |
|         | All-atom       | 2702    | 4940    | 8896  |
